# Supplementary material
Source: ML conference proceedings conference paper supplement (https://openreview.net/forum?id=0T8xRFrScB)
Supplement: supplementary_material [file attachment]

<https://anonymous.4open.science/r/counterfactual-benchmark-7137>
